# Supplementary material for: Mathematical modeling predicts that endemics by generalist insects are eradicated if nearly all plants produce constitutive defense
Source: PubMed Central journal article supplement (PMC11519633; doi:10.1038/s41598-024-74771-0), 2024-10-28
Supplement: 41598_2024_74771_MOESM1_ESM.pdf [file 41598_2024_74771_MOESM1_ESM.pdf]

1 Supplementary information for ‘Endemics by generalist insects are  
2 eradicated if nearly all plants produce constitutive defense. An  
3 explanation by mathematical modeling’

4 Suman Chakraborty<sup>1,2</sup>, Shalu Dwivedi<sup>1</sup>, and Stefan Schuster<sup>1,\*</sup>

5 <sup>1</sup>Dept. of Bioinformatics, Matthias Schleiden Institute, Friedrich Schiller University Jena,  
6 Ernst-Abbe-Pl. 2, 07743 Jena, Germany

7 <sup>2</sup>International Max Planck Research School ‘Chemical Communication in Ecological  
8 Systems’, 07745 Jena, Germany

9 \*Correspondence: stefan.schu@uni-jena.de

10 June 13, 2024

11 This supplementary information contains the derivation and stability analysis of the equilibrium points:  
12  $H_{Free}^*$ ,  $H_{Endemic}^*$ ,  $Q_{Free}^*$  and  $Q_{Endemic}^*$ , respectively.

### 13 **S1. Derivation and stability of $H_{Free}^*$**

14 The equilibrium  $H_{Free}^*$  is obtained from the equations:

$$\frac{dS}{dt} = \mu N - \frac{\eta IS}{N} - \mu S + \alpha E = 0 \quad (1a)$$

$$\frac{dE}{dt} = \frac{\eta IS}{N} - (\mu + \alpha) E = 0 \quad (1b)$$

$$\frac{dI}{dt} = \frac{\beta \eta IS}{N} - \gamma I = 0 \quad (1c)$$

15 From eq. (1c), we obtain:

$$\left( \frac{\beta \eta S}{N} - \gamma \right) I = 0 \quad (2)$$

16 Eq. (2) has two solutions:

17 • **Case 1:**  $I = 0$ .

18 • **Case 2:** If  $I \neq 0$ , then  $S = \gamma N / \eta \beta = N / R_0$ , where  $R_0 = \eta \beta / \gamma$ .

19 Here we analyze only case 1. Case 2 is analyzed in **S2**. Using  $I = 0$  in eq. (1b), we obtain  $E = 0$ . Using  
20  $I = 0$  and  $E = 0$  in eq. (1a), we obtain:

$$S = N$$

21 Therefore, the non-endemic equilibrium is:  $H_{Free}^* = (N, 0, 0)$ .

22 The Jacobian matrix from system 1 is:

$$M = \begin{pmatrix} -\frac{\eta I}{N} - \mu & \alpha & -\frac{\eta S}{N} \\ \frac{\eta I}{N} & -(\mu + \alpha) & \frac{\eta S}{N} \\ \frac{\beta \eta I}{N} & 0 & \frac{\beta \eta S}{N} - \gamma \end{pmatrix}$$

23 At  $H_{Free}^*$  the Jacobian is:

$$M_{H_{Free}^*} = \begin{pmatrix} -\mu & \alpha & -\eta \\ 0 & -(\mu + \alpha) & \eta \\ 0 & 0 & \beta\eta - \gamma \end{pmatrix}$$

24 The characteristic equation of the Jacobian is:

$$\begin{vmatrix} -\mu - \lambda & \alpha & -\eta \\ 0 & -(\mu + \alpha) - \lambda & \eta \\ 0 & 0 & \beta\eta - \gamma - \lambda \end{vmatrix} = 0$$
$$\Rightarrow (-\mu - \lambda)(-(\mu + \alpha) - \lambda)(\beta\eta - \gamma - \lambda) = 0$$

$$\Rightarrow \lambda = -\mu, -(\mu + \alpha), (\beta\eta - \gamma)$$

25  $H_{Free}^*$  is asymptotically stable if all the eigenvalues ( $\lambda$ ) are negative real numbers. Therefore, if  $\beta\eta - \gamma < 0$   
26 or  $R_0 < 1$  (where  $R_0 = \beta\eta/\gamma$ ), then  $H_{Free}^*$  is a stable node. In contrast, if  $\beta\eta - \gamma > 0$  or  $R_0 > 1$ , then one of  
27 the eigenvalues is positive. Thus,  $H_{Free}^*$  becomes a saddle point, which is unstable.

28 **S2. Derivation and stability of  $H_{Endemic}^*$**

29 The equilibrium  $H_{Endemic}^*$  is also obtained from the differential equations given in **S1**.

30 Here, we analyze the case 2 mentioned in **S1**, where  $S = N/R_0$ . Using this value of  $S$  in eqs. (1b) and (1a),  
31 we get:

$$\frac{\eta IS}{N} - (\mu + \alpha) E = 0 \Rightarrow E = \frac{\eta I}{R_0(\mu + \alpha)}$$

$$\begin{aligned} \frac{dS}{dt} &= \mu N - \frac{\eta IS}{N} - \mu S + \alpha E = 0 \\ \Rightarrow \mu N - \frac{\eta I}{R_0} - \frac{\mu N}{R_0} + \frac{\alpha \eta I}{R_0(\mu + \alpha)} &= 0 \\ \Rightarrow \left( \frac{\alpha \eta}{R_0(\mu + \alpha)} - \frac{\eta}{R_0} \right) I &= -\mu N \left( 1 - \frac{1}{R_0} \right) \\ \Rightarrow \left( \frac{\alpha \eta - \mu \eta - \alpha \eta}{R_0(\mu + \alpha)} \right) I &= -\frac{\mu N(R_0 - 1)}{R_0} \\ \Rightarrow \left( \frac{\mu \eta}{(\mu + \alpha)} \right) I &= \mu N(R_0 - 1) \\ \Rightarrow I &= \frac{N(\mu + \alpha)(R_0 - 1)}{\eta} \end{aligned}$$

32 Using this value of  $I$  at  $E = \eta I/R_0(\mu + \alpha)$ , we get:

$$E = \frac{N(R_0 - 1)}{R_0}$$

33 Hence, the endemic equilibrium is:

$$H_{Endemic}^* = \left( \frac{N}{R_0}, \frac{N(R_0 - 1)}{R_0}, \frac{N(\mu + \alpha)(R_0 - 1)}{\eta} \right)$$

34 The Jacobian matrix from system 1 is:

$$M = \begin{pmatrix} -\frac{\eta I}{N} - \mu & \alpha & -\frac{\eta S}{N} \\ \frac{\eta I}{N} & -(\mu + \alpha) & \frac{\eta S}{N} \\ \frac{\beta \eta I}{N} & 0 & \frac{\beta \eta S}{N} - \gamma \end{pmatrix}$$

35 At the endemic equilibrium  $H_{Endemic}^*$ , the Jacobian is:

$$M_{H_{Endemic}^*} = \begin{pmatrix} -(\mu + \alpha)(R_0 - 1) - \mu & \alpha & -\frac{\eta}{R_0} \\ (\mu + \alpha)(R_0 - 1) & -(\mu + \alpha) & \frac{\eta}{R_0} \\ \beta(\mu + \alpha)(R_0 - 1) & 0 & \frac{\beta \eta}{R_0} - \gamma \end{pmatrix}$$

36 The characteristic equation of the Jacobian is:

$$\begin{aligned}
& \begin{vmatrix} -(\mu + \alpha)(R_0 - 1) - \mu - \lambda & \alpha & -\frac{\eta}{R_0} \\ (\mu + \alpha)(R_0 - 1) & -(\mu + \alpha) - \lambda & \frac{\eta}{R_0} \\ \beta(\mu + \alpha)(R_0 - 1) & 0 & \frac{\beta\eta}{R_0} - \gamma - \lambda \end{vmatrix} = 0 \\
\Rightarrow & ((\mu + \alpha)(R_0 - 1) + \mu + \lambda)((\mu + \alpha) + \lambda)\left(\frac{\beta\eta}{R_0} - \gamma - \lambda\right) - \alpha((\mu + \alpha)(R_0 - 1))\left(\frac{\beta\eta}{R_0} - \gamma - \lambda\right) - \frac{\beta\eta}{R_0}(\mu + \alpha)(R_0 - 1) - \frac{\eta}{R_0}((\mu + \alpha) + \lambda)(\beta(\mu + \alpha)(R_0 - 1)) = 0 \\
\Rightarrow & -\lambda(\lambda + \mu + \alpha)(\lambda + \mu + (\mu + \alpha)(R_0 - 1)) + \alpha(\lambda + \frac{\eta\beta}{R_0})(\mu + \alpha)(R_0 - 1) - \frac{\eta\beta}{R_0}(\lambda + \mu + \alpha)(\mu + \alpha)(R_0 - 1) = 0, \quad \text{where } \frac{\beta\eta}{R_0} = \gamma \\
& -\lambda(\lambda + \mu)(\lambda + \mu + \alpha) - \lambda(\lambda + \mu + \alpha)(\mu + \alpha)(R_0 - 1) + (\mu + \alpha)(R_0 - 1)(\alpha\lambda - (\lambda + \mu)\frac{\eta\beta}{R_0}) = 0 \\
& -\lambda(\lambda + \mu)(\lambda + \mu + \alpha) - (\mu + \alpha)(R_0 - 1)(\lambda + \mu)(\lambda + \frac{\eta\beta}{R_0}) = 0 \\
& -\lambda^2(\lambda + \mu) - \lambda(\lambda + \mu)(\mu + \alpha) - (\mu + \alpha)(R_0 - 1)(\lambda + \mu)(\lambda + \frac{\eta\beta}{R_0}) = 0 \\
& (\lambda + \mu)(\lambda^2 + (\mu + \alpha)R_0\lambda + \eta\beta(\mu + \alpha)(1 - \frac{1}{R_0})) = 0 \\
\lambda = & -\mu, -\frac{(\mu + \alpha)R_0}{2} \pm \frac{\sqrt{(\mu + \alpha)^2 R_0^2 - 4\eta\beta(\mu + \alpha)(1 - \frac{1}{R_0})}}{2}
\end{aligned}$$

37 The last two eigenvalues determine the stability of  $H_{Endemic}^*$ , because the first eigenvalue  $(-\mu)$  is always a  
38 negative real number. Since  $R_0 > 1$  or  $1 - 1/R_0 > 0$ ,  $\sqrt{(\mu + \alpha)^2 R_0^2 - 4\eta\beta(\mu + \alpha)(1 - 1/R_0)} < (\mu + \alpha)R_0$  if  
39 the term inside the square root is a positive real number. If the term inside the square root is imaginary, the  
40 eigenvalues are complex conjugate numbers.

41  $H_{Endemic}^*$  is a stable node if all the eigenvalues are negative real numbers. Hence:

$$\begin{aligned}
(\mu + \alpha)^2 R_0^2 & \geq 4\eta\beta(\mu + \alpha) \left(1 - \frac{1}{R_0}\right) \\
(\mu + \alpha)R_0 & \geq 4\gamma \left(1 - \frac{1}{R_0}\right) > 0, \quad \text{since } \beta\eta = \gamma R_0
\end{aligned}$$

$H_{Endemic}^*$  is a stable focus if two of the eigenvalues are complex conjugate numbers with a negative real part.  
Hence:

$$(\mu + \alpha)R_0 < 4\gamma \left(1 - \frac{1}{R_0}\right)$$

42 **S3. Derivation and stability of  $Q_{Free}^*$**

43 The equilibrium  $Q_{Free}^*$  is obtained from the equations:

$$\frac{dS}{dt} = (\mu - \sigma)N - \frac{\eta IS}{N} - \mu S + \alpha E = 0 \quad (3a)$$

$$\frac{dE}{dt} = \frac{\eta IS}{N} - (\mu + \alpha) E = 0 \quad (3b)$$

$$\frac{dI}{dt} = \frac{\beta \eta IS}{N} - \gamma I = 0 \quad (3c)$$

44 From eq. (3c), we obtain:

$$\left( \frac{\beta \eta S}{N} - \gamma \right) I = 0 \quad (4)$$

45 Similar to the eq. (2) in **S1**, eq. (4) also has exactly two solutions:

46 • **Case 1:**  $I = 0$ .

47 • **Case 2:** The other solution is  $S = N/R_0$ , where  $R_0 = \eta\beta/\gamma$ .

48 We only analyze case 1 here. Case 2 is analyzed in **S4**. Using  $I = 0$  at eq. (3b), we get  $E = 0$ . Using  $I = 0$   
49 and  $E = 0$  in eq. (3a), we obtain:

$$\begin{aligned} S &= \frac{(\mu - \sigma)N}{\mu} \\ \Rightarrow S &= (1 - p)N, \quad \text{where } \frac{\sigma}{\mu} = p \end{aligned}$$

50 Therefore, the non-endemic equilibrium is  $Q_{Free}^* = ((1 - p)N, 0, 0)$ .

51 The Jacobian matrix from system 3 is:

$$M = \begin{pmatrix} -\frac{\eta I}{N} - \mu & \alpha & -\frac{\eta S}{N} \\ \frac{\eta I}{N} & -(\mu + \alpha) & \frac{\eta S}{N} \\ \frac{\beta \eta I}{N} & 0 & \frac{\beta \eta S}{N} - \gamma \end{pmatrix}$$

52 At the generalist free equilibrium  $Q_{Free}^*$ , the Jacobian is:

$$M_{Q_{Free}^*} = \begin{pmatrix} -\mu & \alpha & -\eta(1 - p) \\ 0 & -(\mu + \alpha) & \eta(1 - p) \\ 0 & 0 & \beta\eta(1 - p) - \gamma \end{pmatrix}$$

53 The characteristic equation is:

$$\begin{vmatrix} -\mu - \lambda & \alpha & -\eta(1 - p) \\ 0 & -(\mu + \alpha) - \lambda & \eta(1 - p) \\ 0 & 0 & \beta\eta(1 - p) - \gamma - \lambda \end{vmatrix} = 0$$

The eigenvalues are:

$$\lambda = -\mu, -(\mu + \alpha), \beta\eta(1 - p) - \gamma$$

54  $Q_{Free}^*$  is a stable node if all the eigenvalues are real and negative. Hence:

$$\begin{aligned} \beta\eta(1 - p) - \gamma &< 0 \\ \Rightarrow R_0(1 - p) - 1 &< 0, \quad \text{since } R_0 = \frac{\beta\eta}{\gamma} \end{aligned}$$

55 The above inequality is obvious for  $R_0 < 1$ . The specific condition for the stability of  $Q_{Free}^*$  at  $R_0 > 1$  is  
56 discussed below:

$$\begin{aligned} R_0(1 - p) - 1 &< 0 \\ \Rightarrow 1 - p &< \frac{1}{R_0} \\ \Rightarrow p &> 1 - \frac{1}{R_0} \end{aligned}$$

57 That is the stability condition of  $Q_{Free}^*$  for  $R_0 > 1$ . In contrast, if  $p < 1 - 1/R_0$ , then one of the eigenvalues  
58  $(\beta\eta(1 - p) - \gamma)$  is positive. That makes  $Q_{Free}^*$  a saddle point, which is unstable.

59 **S4. Derivation and stability of  $Q_{Endemic}^*$**

60 We also obtain the equilibrium  $Q_{Endemic}^*$  from the differential equations given in **S3**.

61 Using the value  $S = N/R_0$ , mentioned in case 2 of **S3**, in eqs. (3b) and (3a), we obtain:

$$\frac{dE}{dt} = \frac{\eta IS}{N} - (\mu + \alpha) E = 0 \Rightarrow E = \frac{\eta I}{R_0(\mu + \alpha)}$$

$$\begin{aligned} \frac{dS}{dt} &= (\mu - \sigma)N - \frac{\eta IS}{N} - \mu S + \alpha E = 0 \\ \Rightarrow (\mu - \sigma)N - \frac{\eta I}{R_0} - \frac{\mu N}{R_0} + \frac{\alpha \eta I}{R_0(\mu + \alpha)} &= 0 \\ \Rightarrow \left( \frac{\alpha \eta}{R_0(\mu + \alpha)} - \frac{\eta}{R_0} \right) I &= -\mu N \left( 1 - \frac{1}{R_0} \right) + \sigma N \\ \Rightarrow \left( \frac{\alpha \eta - \mu \eta - \alpha \eta}{R_0(\mu + \alpha)} \right) I &= -\frac{\mu N(R_0 - 1)}{R_0} + \sigma N \\ \Rightarrow \left( \frac{\mu \eta}{\mu + \alpha} \right) I &= \mu N(R_0 - 1) - \sigma N R_0 \\ \Rightarrow \left( \frac{\eta}{\mu + \alpha} \right) I &= N(R_0 - 1) - p N R_0, \quad \text{where } p = \sigma/\mu \\ \Rightarrow I &= \frac{(\mu + \alpha)N(R_0 - 1 - p R_0)}{\eta} \\ \Rightarrow I &= \left( 1 - p - \frac{1}{R_0} \right) \frac{(\mu + \alpha)N R_0}{\eta} \end{aligned}$$

62 Using this value of  $I$  at  $E = \eta I / R_0(\mu + \alpha)$ , we get:

$$E = \left( 1 - p - \frac{1}{R_0} \right) N$$

63 Hence, the endemic equilibrium is:

$$Q_{Endemic}^* = \left( \frac{N}{R_0}, \left( 1 - p - \frac{1}{R_0} \right) N, \left( 1 - p - \frac{1}{R_0} \right) \frac{(\mu + \alpha)N R_0}{\eta} \right)$$

64 The Jacobian matrix from system 3 is:

$$M = \begin{pmatrix} -\frac{\eta I}{N} - \mu & \alpha & -\frac{\eta S}{N} \\ \frac{\eta I}{N} & -(\mu + \alpha) & \frac{\eta S}{N} \\ \frac{\beta \eta I}{N} & 0 & \frac{\beta \eta S}{N} - \gamma \end{pmatrix}$$

65 At the endemic equilibrium  $Q_{Endemic}^*$ , the Jacobian is:

$$M_{Q_{Endemic}^*} = \begin{pmatrix} -(\mu + \alpha)(R_0 - p R_0 - 1) - \mu & \alpha & -\frac{\eta}{R_0} \\ (\mu + \alpha)(R_0 - p R_0 - 1) & -(\mu + \alpha) & \frac{\eta}{R_0} \\ \beta(\mu + \alpha)(R_0 - p R_0 - 1) & 0 & \frac{\beta \eta}{R_0} - \gamma \end{pmatrix}$$

66 The characteristic equation of the Jacobian is:

$$\begin{vmatrix} -(\mu + \alpha)(R_0 - pR_0 - 1) - \mu - \lambda & \alpha & -\frac{\eta}{R_0} \\ (\mu + \alpha)(R_0 - pR_0 - 1) & -(\mu + \alpha) - \lambda & \frac{\eta}{R_0} \\ \beta(\mu + \alpha)(R_0 - pR_0 - 1) & 0 & \frac{\beta\eta}{R_0} - \gamma - \lambda \end{vmatrix} = 0$$

67 Replacing  $\frac{\eta\beta}{R_0}$  by  $\gamma$  in the characteristic equation, we get:

$$\begin{vmatrix} -(\mu + \alpha)(R_0 - pR_0 - 1) - \mu - \lambda & \alpha & -\frac{\eta}{R_0} \\ (\mu + \alpha)(R_0 - pR_0 - 1) & -(\mu + \alpha) - \lambda & \frac{\eta}{R_0} \\ \beta(\mu + \alpha)(R_0 - pR_0 - 1) & 0 & -\lambda \end{vmatrix} = 0$$

$$\Rightarrow (\lambda + \mu + (\mu + \alpha)(R_0 - pR_0 - 1))(\lambda + \mu + \alpha)(-\lambda) + \alpha(-\lambda(\mu + \alpha)(R_0 - pR_0 - 1) - \frac{\eta R_0}{\beta}(\mu + \alpha)(R_0 - pR_0 - 1)) - \frac{\beta\eta}{R_0}(\lambda + \mu + \alpha)(\mu + \alpha)(R_0 - pR_0 - 1) = 0$$

$$\Rightarrow -\lambda(\lambda + \mu + (\mu + \alpha)(R_0 - pR_0 - 1))(\lambda + \mu + \alpha) - \alpha(\mu + \alpha)(R_0 - pR_0 - 1)(\lambda + \frac{\eta\beta}{R_0}) - \frac{\eta}{R_0}(\beta(\lambda + \mu + \alpha)(\mu + \alpha)(R_0 - pR_0 - 1)) = 0$$

$$\Rightarrow -\lambda(\lambda + \mu + (\mu + \alpha)(R_0 - pR_0 - 1))(\lambda + \mu + \alpha) + (\mu + \alpha)(R_0 - pR_0 - 1)(\alpha\lambda - (\lambda + \mu)\frac{\eta\beta}{R_0}) = 0$$

$$\Rightarrow -\lambda(\lambda + \mu)(\lambda + \mu + \alpha) - \lambda(\lambda + \mu + \alpha)(\mu + \alpha)(R_0 - pR_0 - 1) + (\mu + \alpha)(R_0 - pR_0 - 1)(\alpha\lambda - (\lambda + \mu)\frac{\eta\beta}{R_0}) = 0$$

$$\Rightarrow -\lambda(\lambda + \mu)(\lambda + \mu + \alpha) - (\mu + \alpha)(R_0 - pR_0 - 1)(\lambda^2 + \mu\lambda + (\lambda + \mu)\frac{\eta\beta}{R_0}) = 0$$

$$\Rightarrow -\lambda(\lambda + \mu)(\lambda + \mu + \alpha) - (\mu + \alpha)(R_0 - pR_0 - 1)(\lambda + \mu)(\lambda + \frac{\eta\beta}{R_0}) = 0$$

$$\Rightarrow -\lambda^2(\lambda + \mu) - (\lambda + \mu)(\mu + \alpha)((R_0 - pR_0 - 1)\frac{\eta\beta}{R_0} + \lambda(R_0 - pR_0)) = 0$$

$$\Rightarrow (\lambda + \mu)(\lambda^2 + \lambda(\mu + \alpha)(R_0 - pR_0) + (\mu + \alpha)(R_0 - pR_0 - 1)\frac{\eta\beta}{R_0}) = 0$$

$$\Rightarrow \lambda = -\mu, -\frac{(\mu + \alpha)(1 - p)R_0}{2} \pm \frac{\sqrt{(\mu + \alpha)^2(1 - p)^2R_0^2 - 4(\mu + \alpha)(R_0(1 - p) - 1)\gamma}}{2}, \quad \text{since } \beta\eta = \gamma R_0$$

88 The first eigenvalue,  $-\mu$ , is a negative real number. Now we analyze the other two eigenvalues. Since  
 89  $Q_{Endemic}^*$  exists when  $p < 1 - 1/R_0$ , the term  $(R_0(1 - p) - 1)$  inside the square root is positive. Therefore,  
 90  $\sqrt{(\mu + \alpha)^2(1 - p)^2R_0^2 - 4(\mu + \alpha)(R_0(1 - p) - 1)\gamma}$  is either a positive real number or an imaginary number.  
 91 Moreover, the square root is less than  $(\mu + \alpha)(1 - p)R_0$  when it is a positive real number. Therefore, either all  
 92 the eigenvalues are negative real numbers or two of them are complex numbers (one is the complex conjugate  
 93 of the other).

94  $Q_{Endemic}^*$  is a stable node if all the eigenvalues are negative real numbers. Hence:

$$(\mu + \alpha)^2(1 - p)^2R_0^2 \geq 4(\mu + \alpha)(R_0(1 - p) - 1)\gamma$$

$Q_{Endemic}^*$  is a stable focus if two of the eigenvalues are complex conjugate numbers with negative a real part.  
 Hence:

$$(\mu + \alpha)(1 - p)^2R_0^2 < 4(R_0(1 - p) - 1)\gamma$$
